# Supplementary material for: Polychrome Bronze Sculpture: A Multi-Analytical Approach to Unveil the Renaissance Gilded Eagles in the Abbey of San Miniato al Monte, Florence
Source: MDPI journal article supplement (doi:10.3390/heritage7020047), 2024-02-14
Supplement: s1 [file s1]

## SUPPLEMENTARY MATERIALS

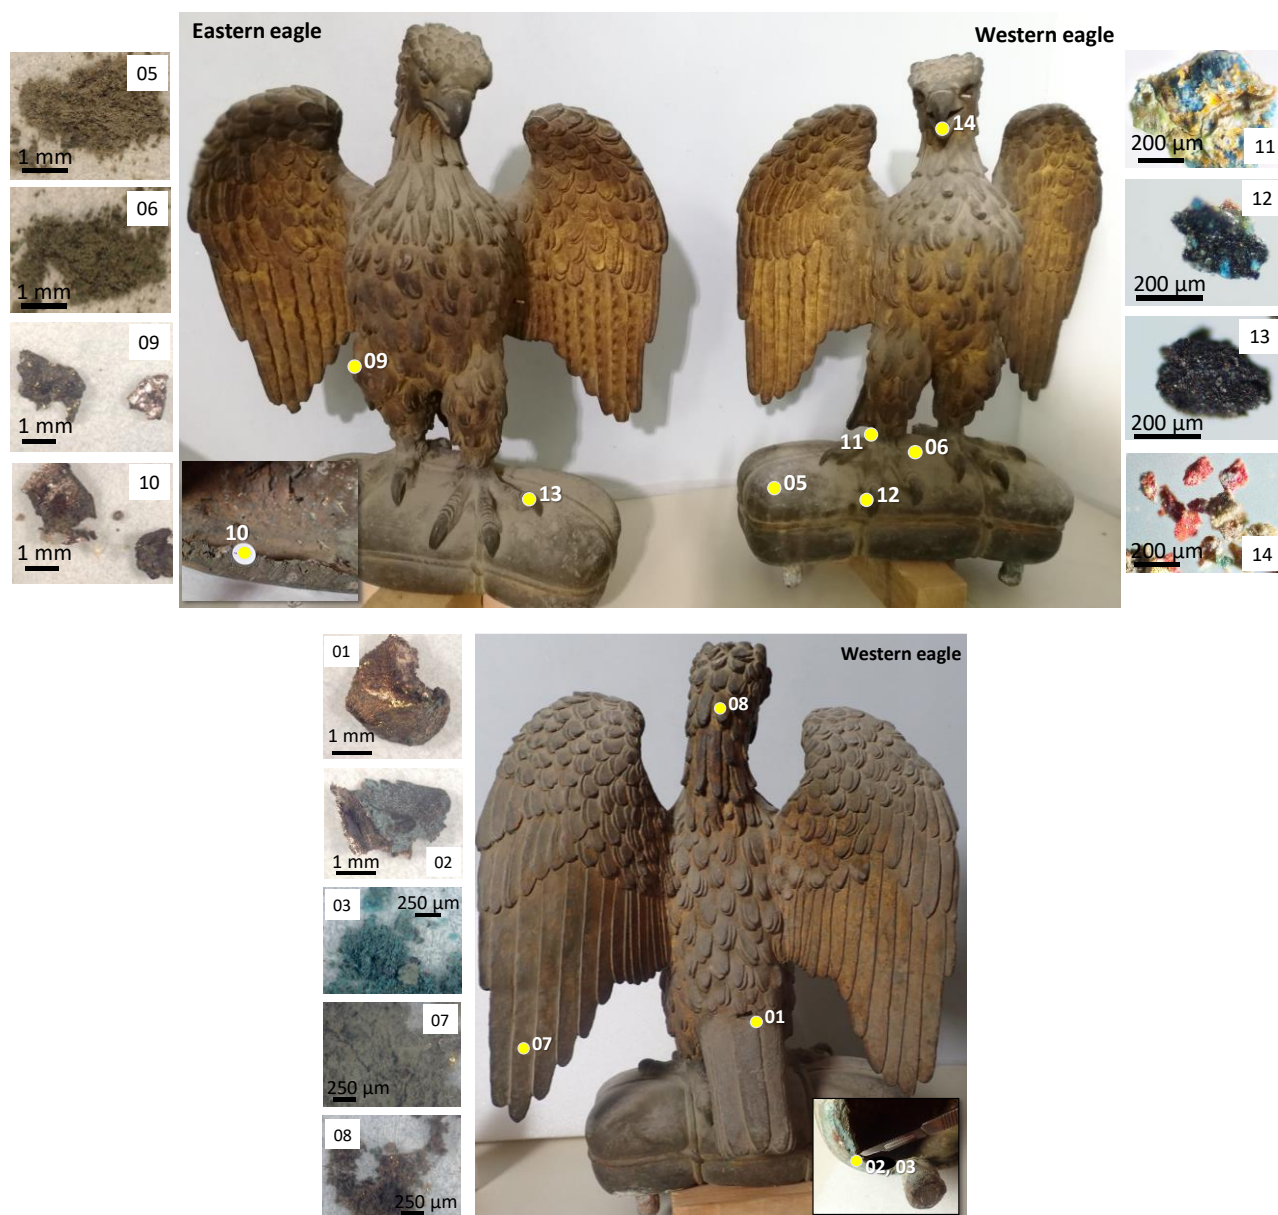

**Figure S1.** Sampling points and corresponding samples (powders and fragments) observed under stereomicroscope.

**Table S1.** For each XRF point of analysis, elements detected and detail of the analyzed surface. Key to notation: **bold** = major, normal = minor, *italic* = trace, (*italic*) = very trace. E: eastern; W: western; f: front; b: back; \*: poorly reliable results due to measurement point difficult to probe.

| Point | Eagle | Description                  | Elements                                                                        | Detail of point of analysis                                                           |
|-------|-------|------------------------------|---------------------------------------------------------------------------------|---------------------------------------------------------------------------------------|
| 01    | E, b  | Red paint on feather         | <b>Cu</b> , Ca, Au, Pb, Fe, Hg, K, ( <i>Mn</i> ), <i>Sn</i> , ( <i>Sb</i> )     |    |
| 02    | E, b  | Feather, right wing          | <b>Cu</b> , Ca, Au, Pb, Fe, <i>Sn</i> , ( <i>Sb</i> ), ( <i>K</i> )             |    |
| 03    | E, b  | Bale of cloth                | <b>Cu</b> , Ca, Fe, Pb, Ag, As, K, <i>Mn</i> , <i>Sn</i> , ( <i>Sb</i> )        |   |
| 04    | E, b  | Lanyard of the bale of cloth | <b>Cu</b> , Ca,Au, Pb, Fe, <i>Sn</i> , <i>Sb</i> , <i>Mn</i> , K, ( <i>Ag</i> ) |  |
| 05    | E, b  | Dark patina on bale of cloth | <b>Cu</b> , Ca, Pb, Sn, Fe, K, Ag, ( <i>As</i> ), ( <i>Sb</i> )                 |  |

06

E, b

Feather on the tail

**Cu**, Ca, Au, Fe, Pb,  
Sn, K, Mn, Si, (Sb)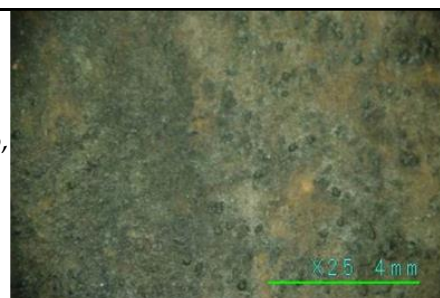

07F

E, b

Red paint on feather

**Cu**, Hg, Au, Pb,  
Sn, Fe, (Sb)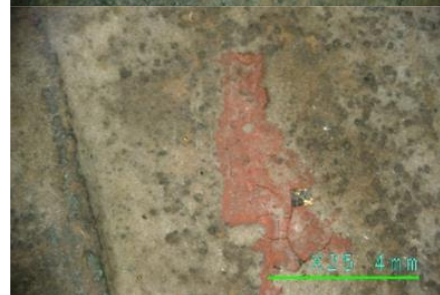

08F

E, b

Feather, right wing

**Cu**, Au, Sn, Pb, Fe,  
Sb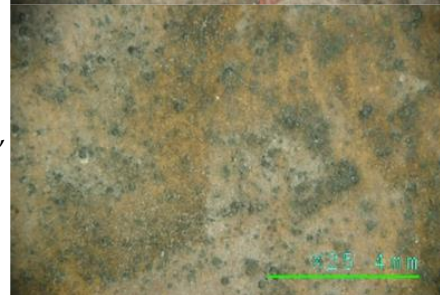

09F

E, b

Feather, right wing

**Cu**, Au, Sn, Pb, Fe,  
Sb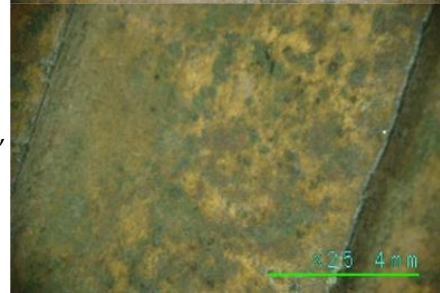

10

E, b

Feather, right wing

**Cu**, Ca, Au, Fe, Pb,  
Sn, Sb, K, Mn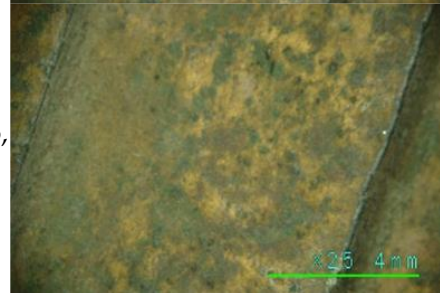

11

W, f

Beak

**Cu**, Ca, Au, Sn, Pb,  
Fe, Sb, K, (Mn)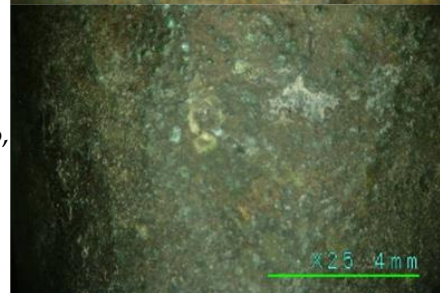

|    |      |               |                                                     |                                                                                       |
|----|------|---------------|-----------------------------------------------------|---------------------------------------------------------------------------------------|
| 12 | W, f | Claw          | <b>Cu</b> , Ca, Hg, Fe, K, Pb, Sn, Sb, Mn           |    |
| 13 | W, f | Claw          | <b>Cu</b> , Ca, Hg, Sn, Pb, Fe, Si, Cl, K, Mn, (Sb) |    |
| 14 | W, f | Beak          | <b>Cu</b> , Ca, Au, Sn, Pb, Fe, K, (Mn), (Sb)       |   |
| 15 | W, f | Claw          | <b>Cu</b> , Ca, Sn, Pb, Fe, Hg, Si, Cl, K, Mn, (Sb) |  |
| 16 | W, f | Right paw     | <b>Cu</b> , Ca, Sn, Pb, Fe, Si, As, Cl, K, Mn, (Sb) |  |
| 17 | W, f | Bale of cloth | <b>Cu</b> , Ca, Fe, Pb, Ag, As, K, Mn, Sn, (Sb)     |  |

|    |      |                                 |                                                    |                                                                                       |
|----|------|---------------------------------|----------------------------------------------------|---------------------------------------------------------------------------------------|
| 18 | W, f | Lanyard on the bale<br>of cloth | <b>Cu</b> , Ca, Au, Fe, Pb,<br>Sn, K, (Mn), (Sb)   | 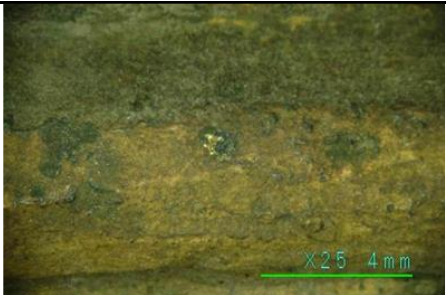   |
| 19 | W, f | Feather, left wing              | <b>Cu</b> , Ca, Au, Sn, Pb,<br>Fe, K, Mn, (Sb)     |    |
| 20 | E, f | Beak                            | <b>Cu</b> , Ca, Au, Sn, Pb,<br>Fe, K, (Mn), (Sb)   |   |
| 21 | E, f | Claw                            | <b>Cu</b> , Ca, Sn, Pb, Fe,<br>K, (Mn), (Sb)       |  |
| 22 | E, f | Claw                            | <b>Cu</b> , Ca, Sn, Pb, Fe,<br>K, (Mn), (Sb)       |  |
| 23 | E, f | Left paw                        | <b>Cu</b> , Ca, Sn, Pb, Fe,<br>K, (As), (Mn), (Sb) |  |

24

E, f

Feather, right wing

**Cu**, Ca, Au, Sn, Pb,  
Fe, K, (Mn), (Sb)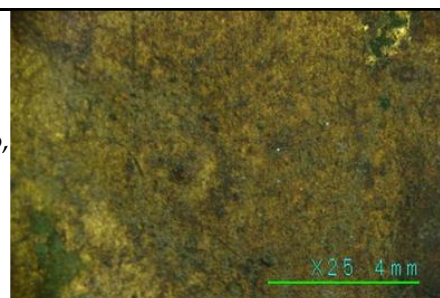

25

E, f

Feather on neck

**Cu**, Ca, Au, Sn, Pb,  
Fe, (K), (Mn), (Sb)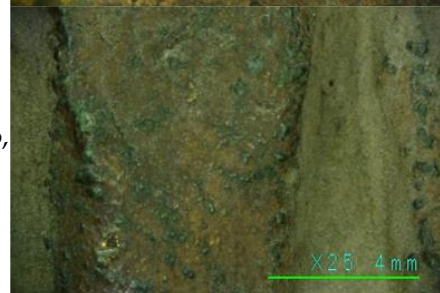

26\*

E, f

Inside bale of cloth

**Cu**, Fe, Pb, Ca, Sn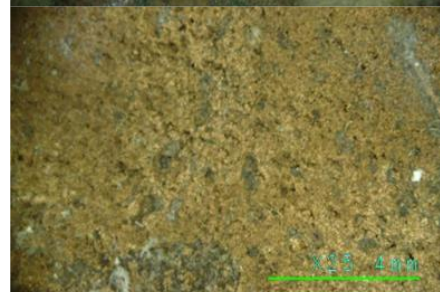

27\*

E, f

Inside bale of cloth

**Cu**, Fe, Ca, Pb, Sn,  
(Mn)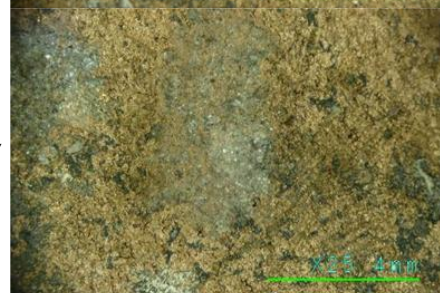

28

E, f

Left paw

**Cu**, Ca, Sn, Pb, Fe,  
K, Mn, (Sb)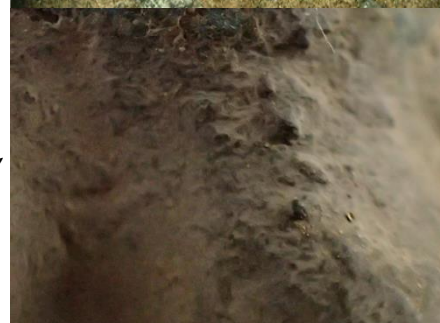

29

E, f

Bale of cloth

**Cu**, Ca, Fe, Pb, Sn,  
Ag, As, K, Mn, (Sb)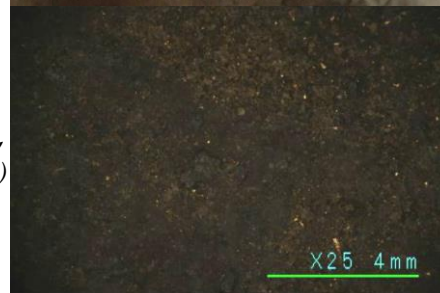

|    |      |           |                                                             |                                                                                                   |
|----|------|-----------|-------------------------------------------------------------|---------------------------------------------------------------------------------------------------|
| 30 | E, f | Eye       | <b>Cu</b> , Ca, Fe, Au, Pb,<br>Sn, (K), (Sb)                |                |
| 31 | E, f | Claw      | <b>Cu</b> , Ca, Sn, Pb, Fe,<br>As, K, Si, (Mn), (Sb)        | <br>X25 4 mm   |
| 32 | E, f | Left paw  | <b>Cu</b> , Ca, Sn, Pb, Fe,<br>K, (Mn), (Sb)                | <br>X25 4 mm  |
| 33 | W, f | Right paw | <b>Cu</b> , Ca, Sn, Pb, Fe,<br>(Sb)                         | <br>X25 4 mm |
| 34 | W, f | Claw      | <b>Cu</b> , Ca, Sn, Pb, Fe,<br>Hg, As, K, Si, (Mn),<br>(Sb) | <br>X25 4 mm |
| 35 | W, f | Eye       | <b>Cu</b> , Ca, Fe, Au, Pb,<br>Sn, (K), (Hg), (Mn),<br>(Sb) | <br>X25 4 mm |

|     |      |                       |                                                            |                                                                                     |
|-----|------|-----------------------|------------------------------------------------------------|-------------------------------------------------------------------------------------|
| 36  | W, b | Bale of cloth         | <b>Cu</b> , Ca, Fe, Pb, Sn,<br><i>Ag, (As), (Mn), (Sb)</i> | 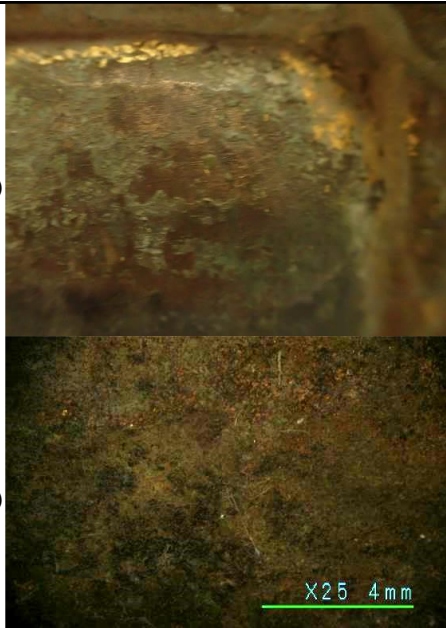 |
| 37  | W, b | Bale of cloth         | <b>Cu</b> , Ca, Fe, Pb, Sn,<br><i>Ag, (As), (Mn), (Sb)</i> |                                                                                     |
| 38  | W, b | Bale of cloth         | <b>Cu</b> , Ca, Fe, Pb, Sn,<br><i>Ag, (As), (Mn), (Sb)</i> | n.a.                                                                                |
| 39  | W, b | Bale of cloth         | <b>Cu</b> , Ca, Fe, Pb, Sn,<br><i>Ag, Mn, (As), (Sb)</i>   | n.a.                                                                                |
| 40F | W, b | Bale of cloth, see 36 | <b>Cu</b> , Pb, Sn, <i>Sb, Ag,</i><br><i>Ca, Fe, (Mn)</i>  | n.a.                                                                                |
| 41F | W, b | Bale of cloth, see 37 | <b>Cu</b> , Pb, Sn, <i>Sb, Ag,</i><br><i>Ca, Fe, (Mn)</i>  | n.a.                                                                                |
| 42F | W, f | Claw, see 34          | <b>Cu</b> , Sn, Pb, <i>Fe, Hg,</i><br><i>Ca, (Sb)</i>      | n.a.                                                                                |
| 43F | E, f | Claw, see 31          | <b>Cu</b> , Sn, Pb, <i>Fe, Ca,</i><br><i>(Ag), (Sb)</i>    | n.a.                                                                                |
| 44F | E, f | Left paw, see 28      | <b>Cu</b> , Sn, Pb, Fe, <i>Ca,</i><br><i>(Sb)</i>          | n.a.                                                                                |
| 45F | E, f | Claw, see 31          | <b>Cu</b> , Sn, Pb, <i>Fe, Ca,</i><br><i>Sb, (Ag)</i>      | n.a.                                                                                |
| 46F | E, f | Claw, see 31          | <b>Cu</b> , Sn, Pb, <i>Fe, Ca,</i><br><i>Sb, (Ag)</i>      | n.a.                                                                                |

---

|     |      |              |                                                         |      |
|-----|------|--------------|---------------------------------------------------------|------|
| 47F | W, f | Claw         | <b>Cu</b> , Sn, Pb, <i>Hg, Fe,</i><br><i>Ca, Sb, Ag</i> | n.a. |
| 48F | W, f | Eye, see 35  | <b>Cu</b> , Au, Pb, Sn, <i>Fe,</i><br><i>(Sb)</i>       | n.a. |
| 49F | E, f | Eye, see 30  | <b>Cu</b> , Au, Pb, Sn, <i>Fe,</i><br><i>(Sb)</i>       | n.a. |
| 50F | W, f | Claw, see 34 | <b>Cu</b> , Au, Pb, Sn,<br><i>Hg, Fe, Sb, (Ag)</i>      | n.a. |

---

**Table S2.** Main vibration bands detected in the samples taken from the eagles, with their assignments.

| Compound                | Vibration band (cm <sup>-1</sup> ) | Assignment                                                     | Refs.    |
|-------------------------|------------------------------------|----------------------------------------------------------------|----------|
| Gypsum                  | 3512,3400                          | $\nu(\text{OH})$                                               | [36]     |
|                         | 1133                               | $\nu_3(\text{SO}_4^{2-})$                                      |          |
| Calcium oxalate         | 1644,1621                          | $\nu_{\text{as}}(\text{C-O})$ overlapping $\delta(\text{HOH})$ | [37,38]  |
|                         | 1320                               | $\nu_{\text{s}}(\text{C-O})$                                   |          |
| Atacamite               | 3447,3350                          | $\nu(\text{OH})$                                               | [39]     |
|                         | 987-846                            | OH deformation                                                 |          |
| Moolooite               | 1367, 1322                         | $\nu_{\text{s}}(\text{C-O}) + \delta(\text{O-C=O})$            | [38,40]  |
|                         | 828                                | $\delta(\text{O-C=O}) + \nu(\text{Cu-O})$                      |          |
| Lipid substance         | 2927, 2855                         | $\nu_{\text{as}}(\text{CH}_3), \nu_{\text{s}}(\text{CH}_2)$    | [41]     |
|                         | 1716                               | $\nu(\text{C=O})$                                              |          |
| Azurite                 | 3412                               | $\nu(\text{OH})$                                               | [42]     |
|                         | 1464, 1403                         | $\nu_3(\text{CO}_3^{2-})$                                      |          |
| Metal carboxylate       | 951                                | $\delta(\text{O-H})$ out-of-plane bending                      | [43-45]  |
|                         | 2928, 2858                         | $\nu_{\text{as}}(\text{CH}_3), \nu_{\text{s}}(\text{CH}_2)$    |          |
| Proteinaceous substance | 1590-1400                          | $\nu_{\text{a}}(\text{COO}^-), \nu_{\text{a}}(\text{COO}^-)$   | [46, 47] |
|                         | 3400                               | $\nu(\text{N-H})$                                              |          |
| Calcium carbonate       | 1644                               | $\nu(\text{C}=\text{O})$ (amide I)                             | [46, 47] |
|                         | 1536                               | $\delta(\text{NH}) + \nu(\text{CN})$ (amide II)                |          |
| Silicate                | 1412                               | $\nu_3(\text{CO}_3^{2-})$                                      | [47]     |
|                         | 1095                               | $\nu_{\text{as}}(\text{Si-O-Si})$                              | [48]     |

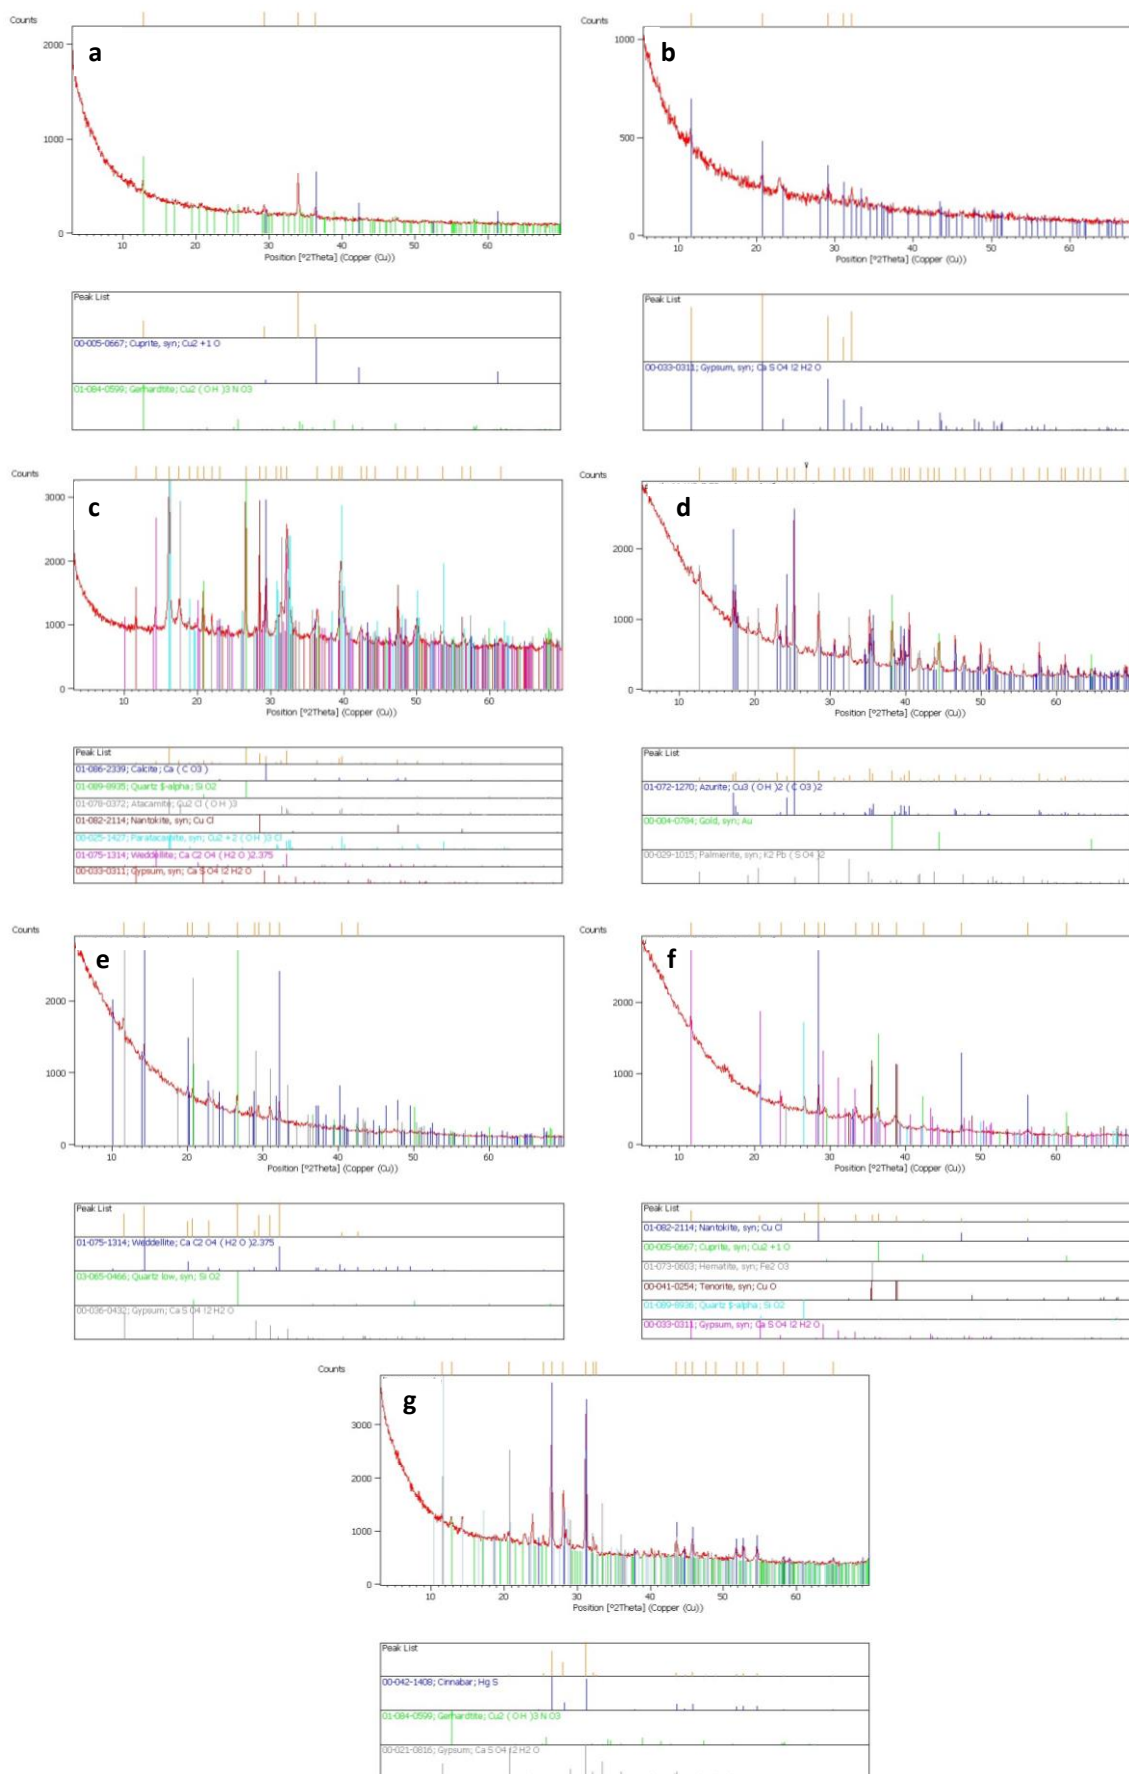

**Figure S2.** XRPD pattern of micro-samples. (a) Sample 3; (b) Sample 4; (c) Sample 6; (d) Sample 11; (e) Sample 12; (f) sample 13; (g) Sample 14.

Body

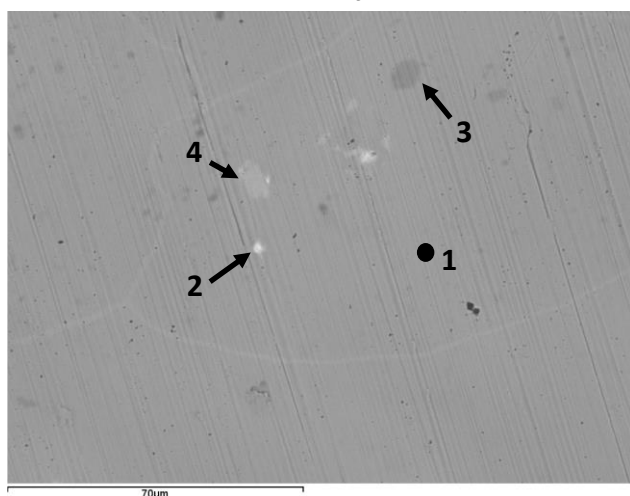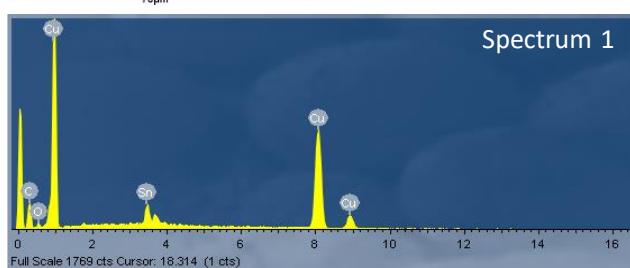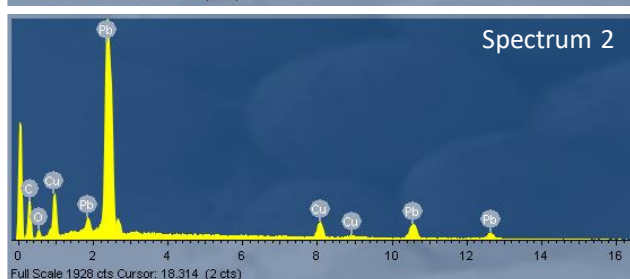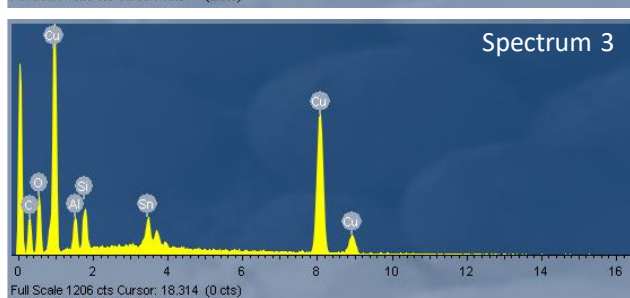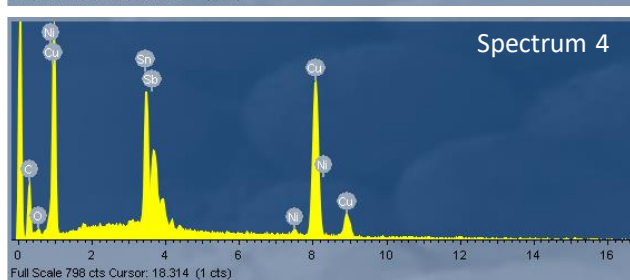

Bale of cloth

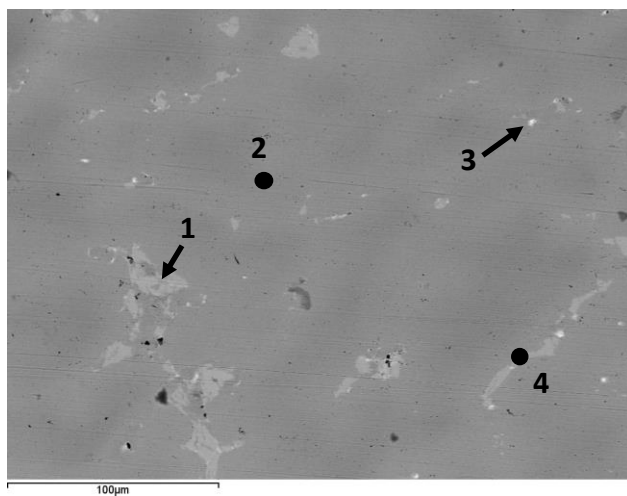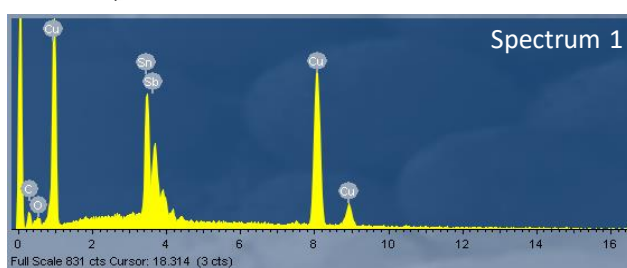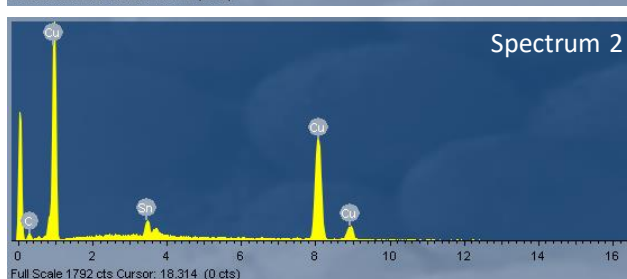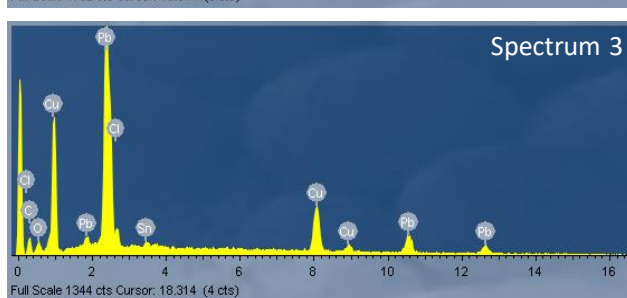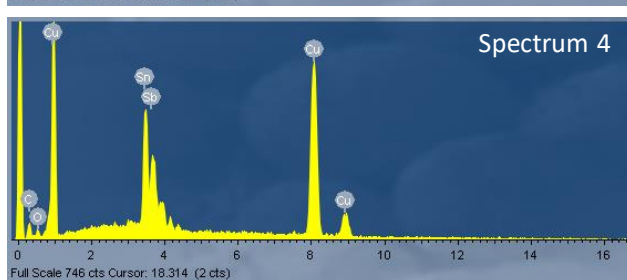

**Figure S3.** SEM-EDS analysis of the alloy of samples 01 (body) and 02 (bale of cloth) from the Western eagle.

## References in Supplementary Materials

36. La Russa, M.F.; Ruffolo, S.A.; Barone, G.; Crisci, G.M.; Mazzoleni, P.; Pezzino, A. The use of FTIR and micro-FTIR spectroscopy: an example of application to Cultural Heritage. *Int J Spectr* 2009.
37. Monico, L.; Rosi, F.; Miliani, C.; Daveri, A.; Brunetti, B.G. Non invasive identification of metal-oxalate complexes on polychrome artwork surfaces by reflection mid-infrared spectroscopy. *Spectrochim Acta Part A: Mol Biomol Spectrosc* 2013, 116:270–280.
38. Frost, R.L. Raman spectroscopy of natural oxalates. *Anal Chim Acta* 2004, 517:207–214.
39. Martens, W. N.; Frost, R.L.; Williams, P. Raman and infrared spectroscopic study of the basic copper chloride minerals: implications for the study of the copper and brass corrosion and "bronze disease". *Neues Jahrbuch für Mineralogie. Abhandlungen* 2003, 178(2):197-215.
40. Frost, R.L.; Yang, J.; Ding, Z. Raman and FTIR spectroscopy of natural oxalates: Implications for the evidence of life on Mars. *Chin.Sci.Bull*, 2003, 48, 1844–1852.
41. Van der Weerd, J.; Van Loon, A.; Boon, J.J. FTIR studies of the effects of pigments on the aging of oil. *Stud Conserv*, 2005, 50:3–22.
42. Vetter, W.; Latini, I.; Schreiner, M. Azurite in medieval illuminated manuscripts: a reflection-FTIR study concerning the characterization of binding media. *Herit Sci*, 2019, 7:21.
43. Filopoulou, A.; Vlachou, S.; Boyatzis, S.C. Fatty Acids and Their Metal Salts: A Review of Their Infrared Spectra in Light of Their Presence in Cultural Heritage. *Molecules*, 2021, 26, 6005.
44. Robinet, L.; Corbeil, M.C. The characterization of metal soaps. *Stud Conserv*, 2003, 48:23–40.
45. Otero, V.; Sanches, D.; Montagner, C.; Vilarigues, M.; Carlyle, L.; Lopes, J.A.; Melo, M.J. Characterisation of metal carboxylates by Raman and infrared spectroscopy in works of art. *J Raman Spectrosc*, 2014, 45:1197–1206.
46. Pellegrini, D.; Duce, C.; Bonaduce, I.; Biagi, S.; Ghezzi, L.; Colombini, M.P.; Tinè, M.R.; Bramanti, E. Fourier transform infrared spectroscopic study of rabbit glue/inorganic pigments mixtures in fresh and aged reference paint reconstructions, *Microchemical Journal*, 2016, 124: 31-35.
47. Guglielmi, V.; Andreoli, M.; Comite, V.; Baroni, A.; Fermo, P. The combined use of SEM-EDX, Raman, ATR-FTIR and visible reflectance techniques for the characterisation of Roman wall painting pigments from Monte d'Oro area (Rome): an insight into red, yellow and pink shades. *Environ Sci Pollut Res* 2022, 29, 29419–29437.
48. Müller, C.; Pejčić, B.; Esteban, L.; Delle Piane, C.; Raven, M.; Mizaikoff, B. Infrared Attenuated Total Reflectance Spectroscopy: An Innovative Strategy for Analyzing Mineral Components in Energy Relevant Systems. *Sci Rep*, 2014, 4:6764.
49. Ellerbrock, R.; Stein, M.; Schaller, J. Comparing amorphous silica, short-range-ordered silicates and silicic acid species by FTIR. *Sci Rep*, 2022, 12:11708.
